# Supplementary material for: TGFB3-AS1 promotes Hcy-induced inflammationof macrophages via inhibiting the maturityof miR-144 and upregulating Rap1a
Source: PubMed Central journal article supplement — Mol Ther Nucleic Acids. 2021 Nov 3;26:1318–35. doi: 10.1016/j.omtn.2021.10.031 (PMC8609111; doi:10.1016/j.omtn.2021.10.031), 2021-11-03
Supplement: mmc1.pdf [file mmc1.pdf]

OMTN, Volume 26

## **Supplemental information**

### **TGFB3-AS1 promotes Hcy-induced inflammation of macrophages via inhibiting the maturity of miR-144 and upregulating Rap1a**

**Hui Zhang, Yinju Hao, Anning Yang, Lin Xie, Ning Ding, Lingbo Xu, Yanhua Wang, Yong Yang, Yongsheng Bai, Huiping Zhang, and Yideng Jiang**

**Supplemental Table 1. Primer sequences for real-time PCR**

| Gene             | sense                          | antisense                      |
|------------------|--------------------------------|--------------------------------|
| TGFB3-AS1        | 5'-TTGAGTGAATGAATGGAGGA-3'     | 5'-AAATGGAGGGAAGAGGACA-3'      |
| Rap1a            | 5'-CGTGAGTACAAGCTAGTGGTCC-3'   | 5'-CCAGGATTTTCGAGCATACTG-3'    |
| IL-1 $\beta$     | 5'-GCTTCAGGCAGGCAGTATCA-3'     | 5'-TGCAGTTGTCTAATGGG AACG-3'   |
| IL-6             | 5'-ACTCACCTCTTCAGAACGAATTG-3   | 5'-CCATCTTTGGAAGGTTTCAGGTTG-3' |
| TNF- $\alpha$    | 5'-CCTCTCTCTAATCAGCCCTCTG-3'   | 5'-GAGGACCTGGGAGTAGATGAG-3'    |
| miR-144          | 5'- CCTCGCACCTGGAGGCTGGCTG -3' | 5'- TTATCAGTTGGGAAAATAGTTA -3' |
| Wnt3a            | 5'-GCGGCTGTAGTGAGGACATT-3'     | 5'- GGGTGAGGCCTCGTAGTAGA-3'    |
| Wnt5a            | 5'-TCCCTGGAAGCAGACGTTTC-3'     | 5'-CCAAGATGCCCCCAGTTCAT-3'     |
| $\beta$ -catenin | 5'-ATCTTAAGCCCTCGCTCGG-3'      | 5'-GCTGAGCTTCAGGTACCCTC-3'     |
| GAPDH            | 5'-GATATTGTTGCCATCAATGAC-3'    | 5'-TTGATTTTGGAGAGATCTCGG-3'    |
| U6               | 5'-GTGCTCGCTTCGGCAGCACATAT-3'  | 5'-GAATCGAGCACCAGTTACGC-3'     |

Supplemental Figure 1.

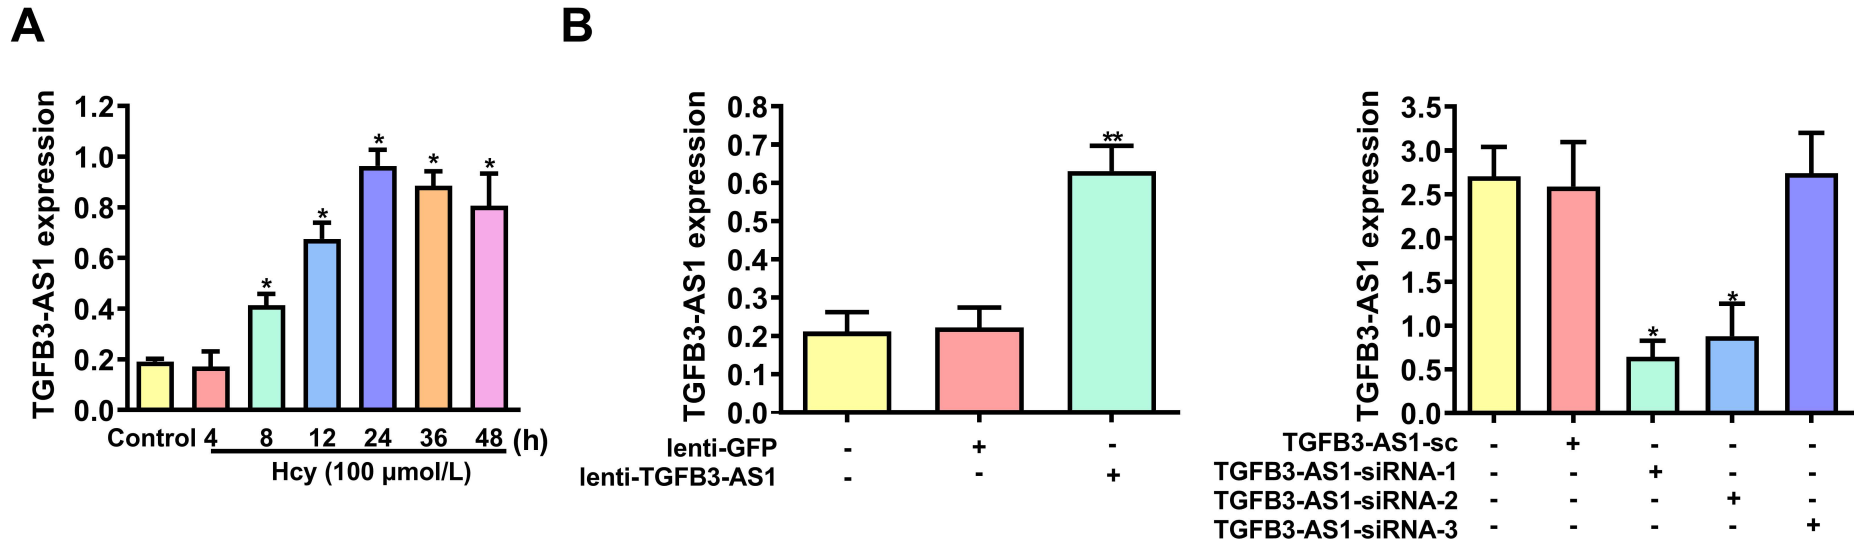

**Figure S1. Overexpression or silence TGFB3-AS1 in macrophages.** (A) The expression of TGFB3-AS1 was analyzed by qRT-PCR after macrophages were treated with 100 $\mu$ mol/L Hcy for different times (4, 8, 12, 24, 36, and 48h). (B) qRT-PCR examined TGFB3-AS1 expression levels in macrophages transduced with lenti-TGFB3-AS1 or TGFB3-AS1-siRNAs (siRNA-1, 2 and 3). \* $P$ <0.05, \*\* $P$ <0.01, compared with Control, lenti-GFP or TGFB3-AS1-sc.
